# Supplementary figures and images for: Identification of bisindolylmethane–hydrazone hybrids as novel inhibitors of β-glucuronidase, DFT, and in silico SAR intimations
Source: Royal Society of Chemistry journal article supplement (doi:10.1039/c5ra19513f), 2015-12-15

**Table 1S** Optimized structures of bisindolylmethane derivatives.

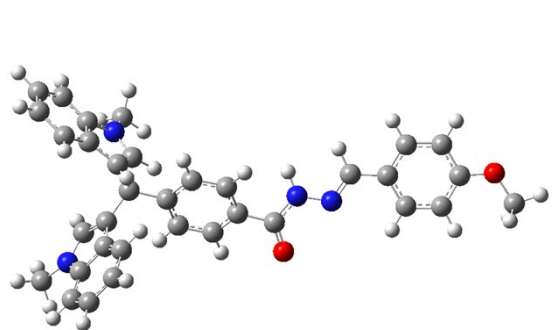

**1**

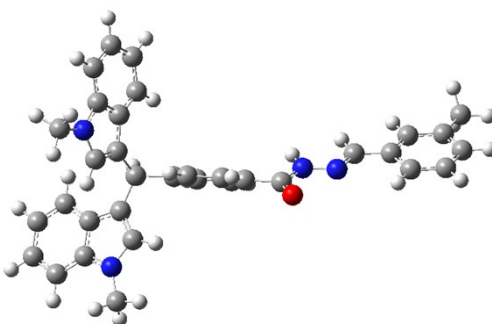

**2**

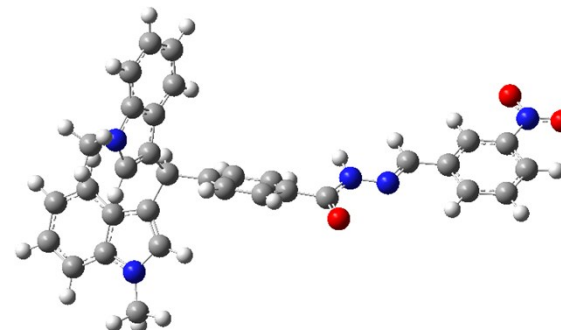

**3**

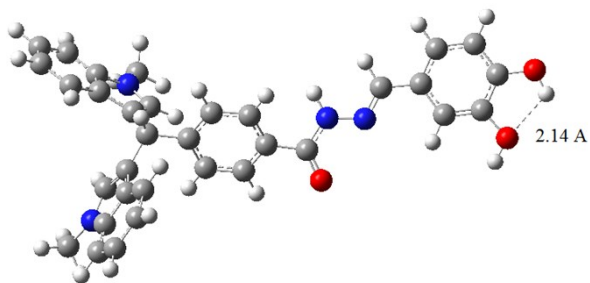

**4**

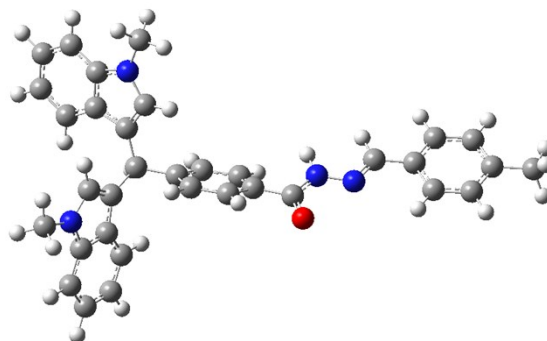

**5**

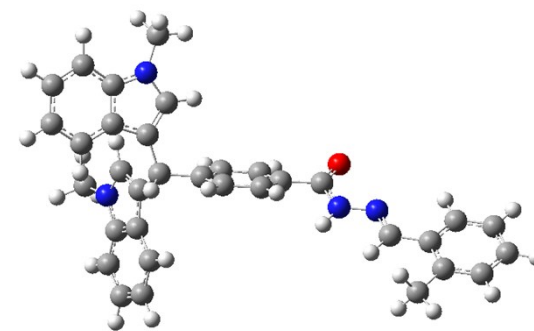

**6**

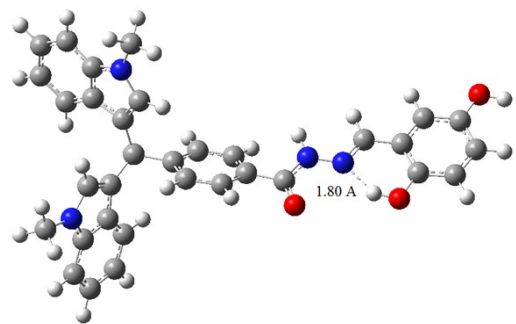

7

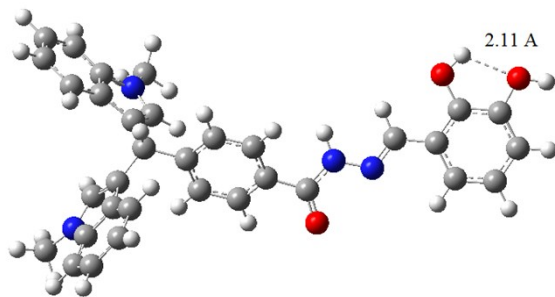

8

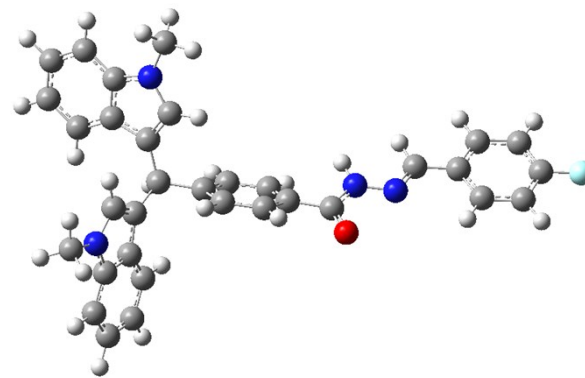

9

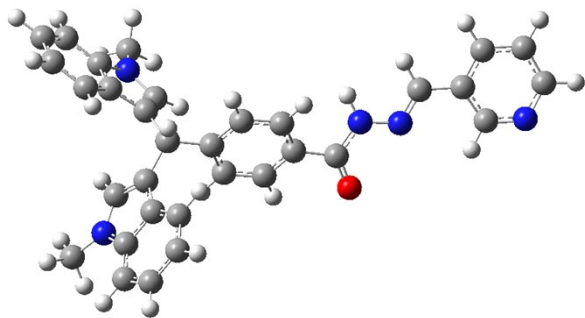

10

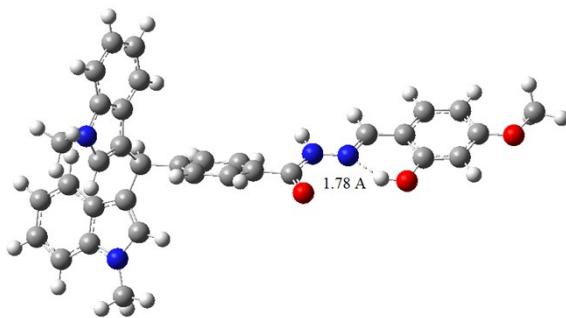

11

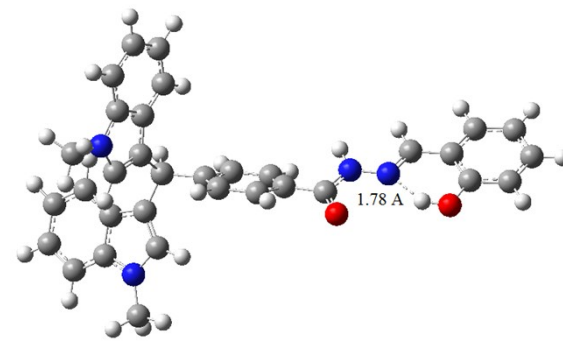

12

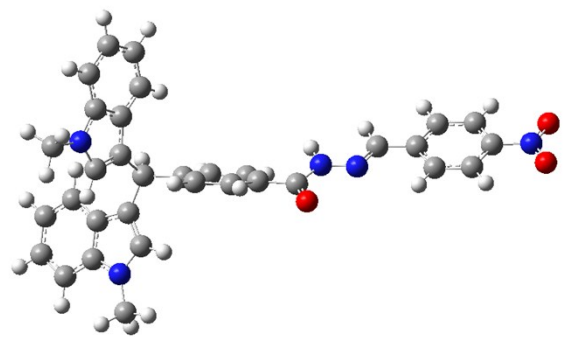

13

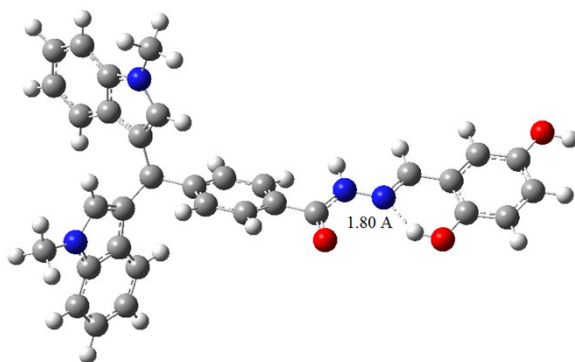

14

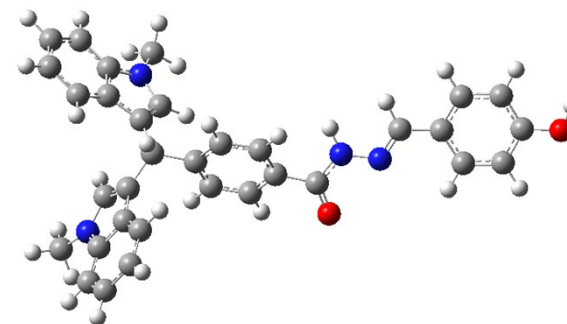

15

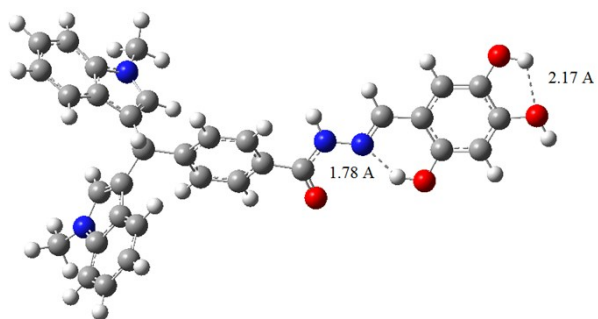

16

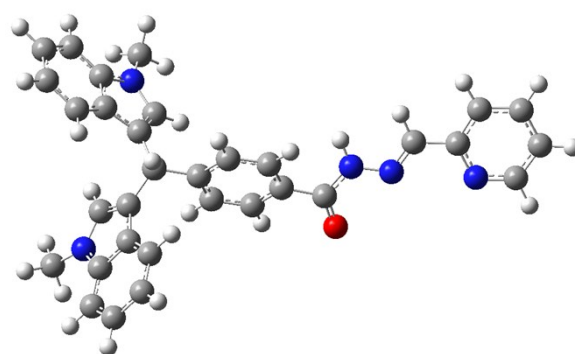

17

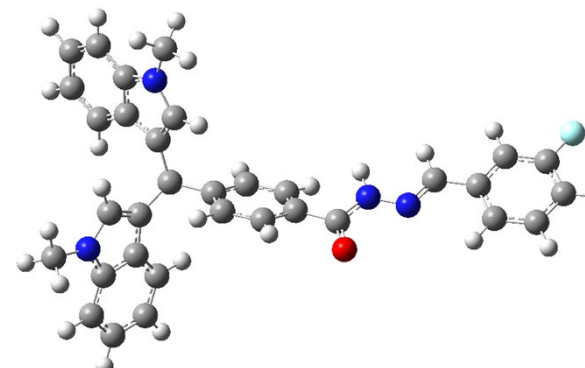

18

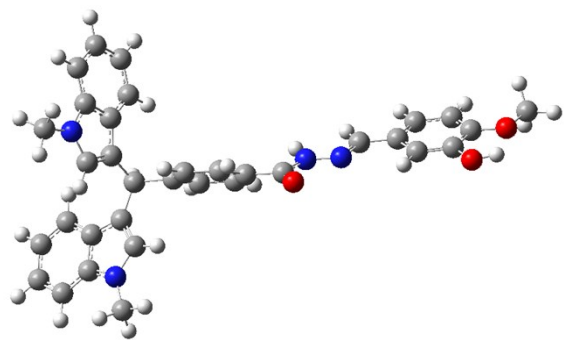

19

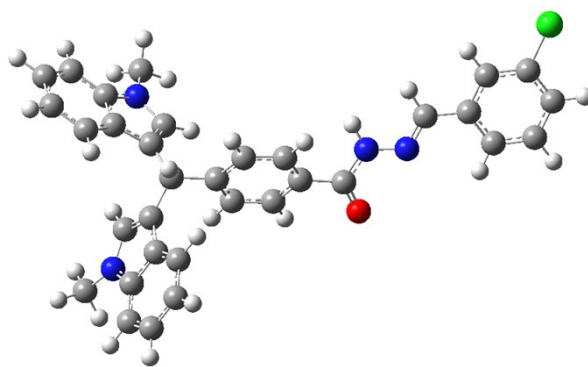

20

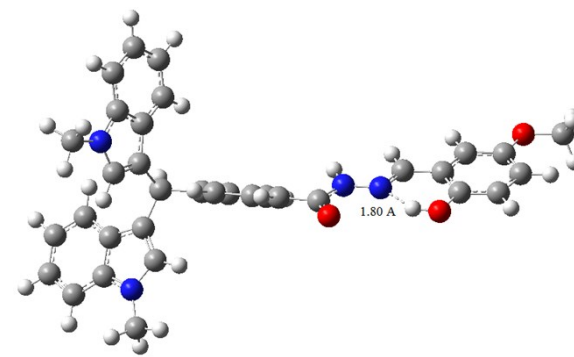

21

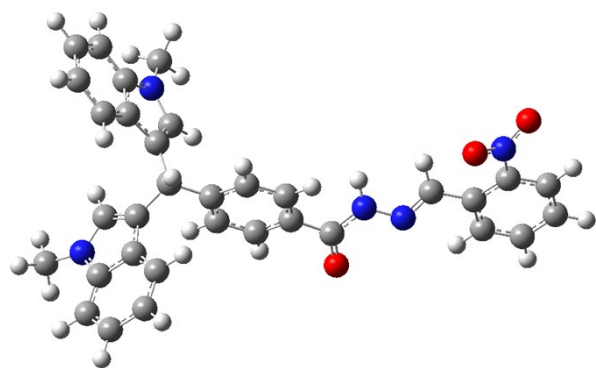

22

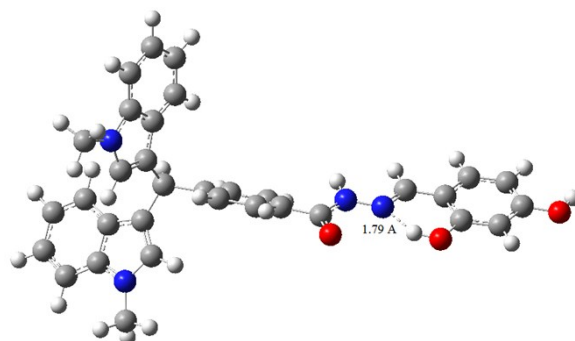

23

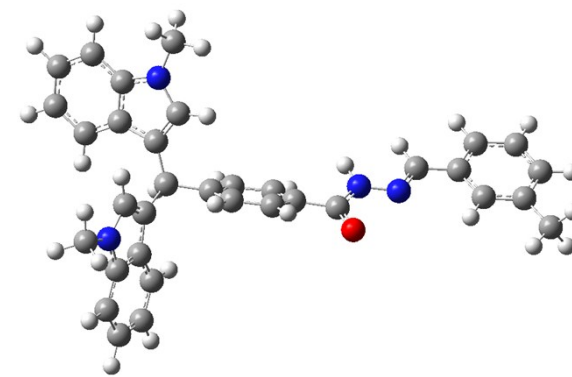

24

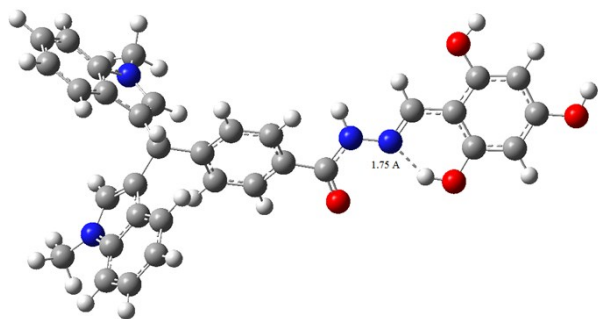

25

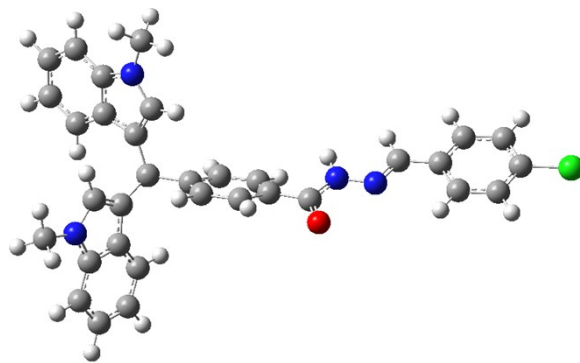

26

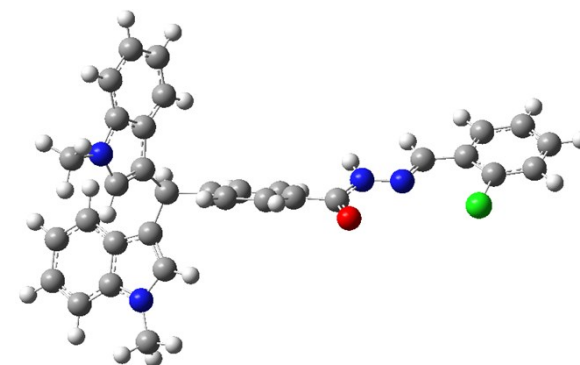

27

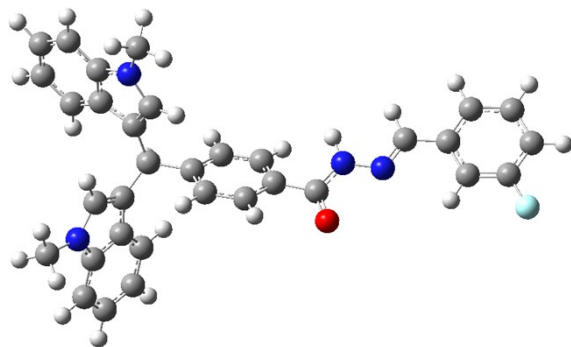

28

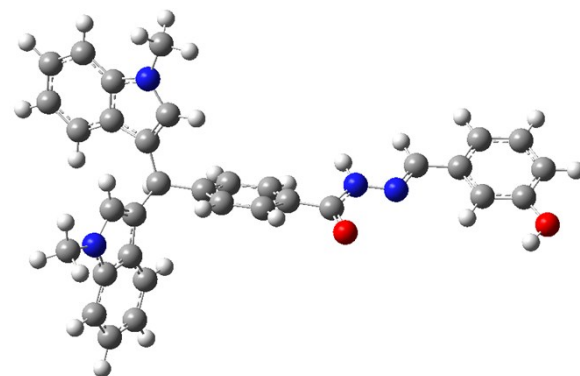

29

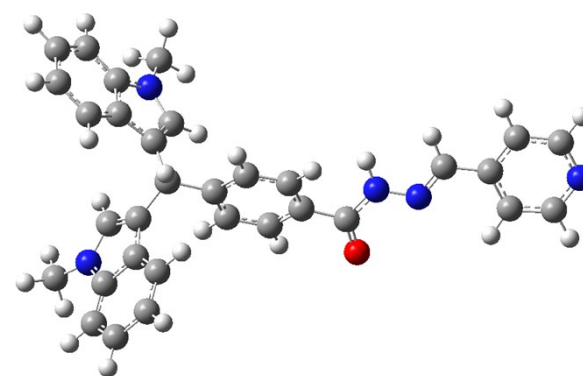

30

Supplement: c5ra19513f2.pdf [file c5ra19513f2.pdf]
